# Supplementary material
Source: PubMed Central journal article supplement (PMC3659997)
Supplement: supp_2012.070011_2012.070011.MISIEWICZ-KRZEMINSKA_SUPPL.pdf [file supp_2012.070011_2012.070011.MISIEWICZ-KRZEMINSKA_SUPPL.pdf]

# Restoration of microRNA-214 expression reduces growth of myeloma cells through positive regulation of P53 and inhibition of DNA replication

Irena Misiewicz-Krzeminska,<sup>1,2</sup> María E. Sarasquete,<sup>1</sup> Dalia Quwaider,<sup>1</sup> Patryk Krzeminski,<sup>1</sup> Fany V. Ticona,<sup>1</sup> Teresa Paíno,<sup>1</sup> Manuel Delgado,<sup>1</sup> Andreia Aires,<sup>1</sup> Enrique M. Ocio,<sup>1</sup> Ramón García-Sanz,<sup>1</sup> Jesús F. San Miguel,<sup>1</sup> and Norma C. Gutiérrez<sup>1</sup>

<sup>1</sup>Servicio de Hematología, Hospital Universitario. IBSAL, IBMCC (USAL-CSIC), Salamanca, Spain, and <sup>2</sup>National Medicines Insitute, Warsaw, Poland

©2013 Ferrata Storti Foundation. This is an open-access paper. doi:10.3324/haematol.2012.070011

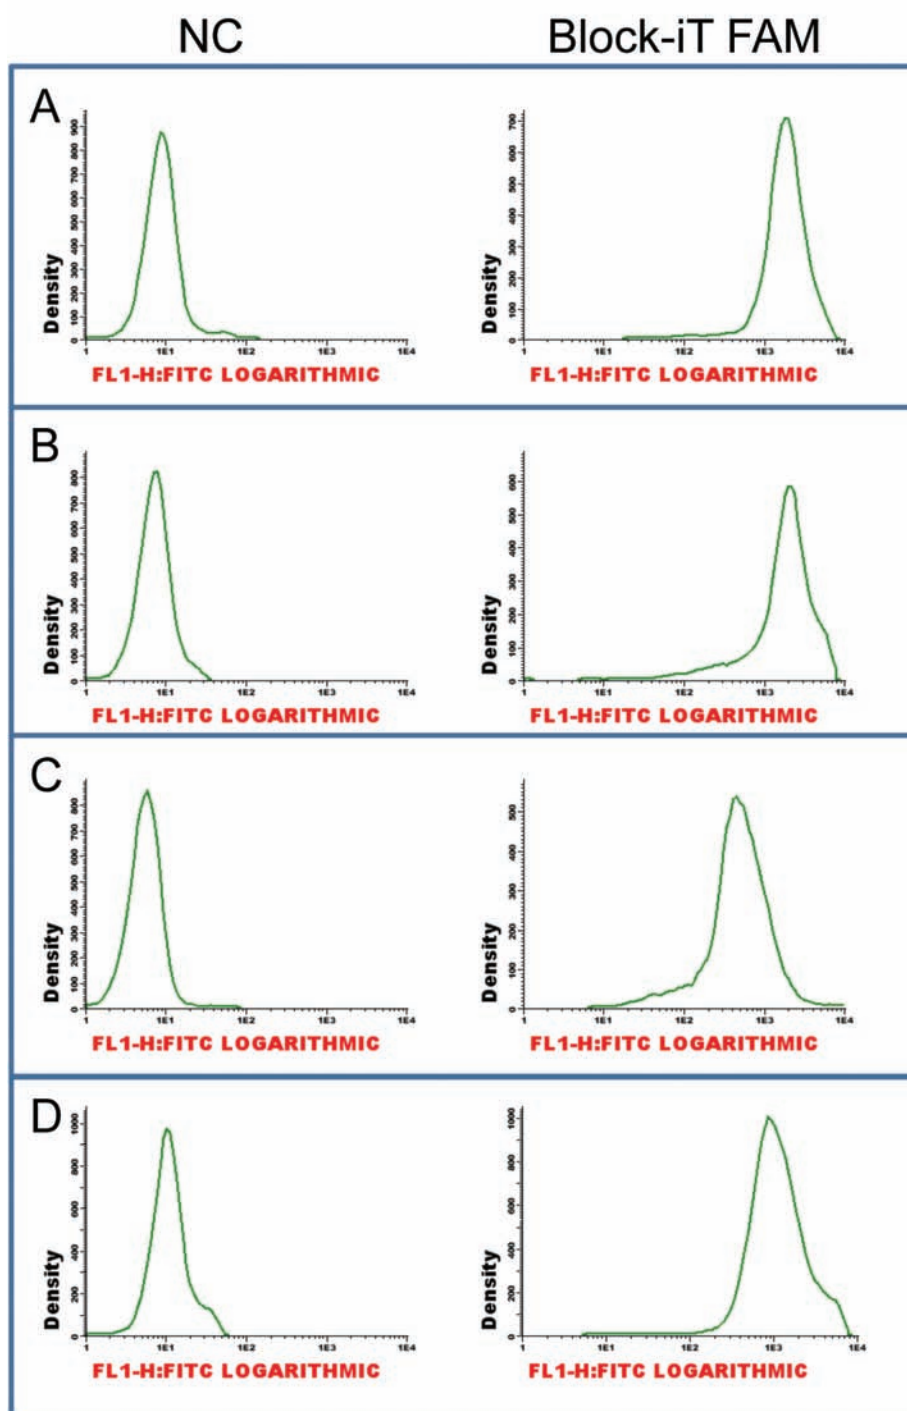

Online Supplementary Figure S1. Transfection efficiency measured by flow cytometric assessment of Block-iT FAM fluorescence in myeloma cell lines; H929 (A), JN3 (B), MM1S (C) and RPMI-8226 (D).

**A**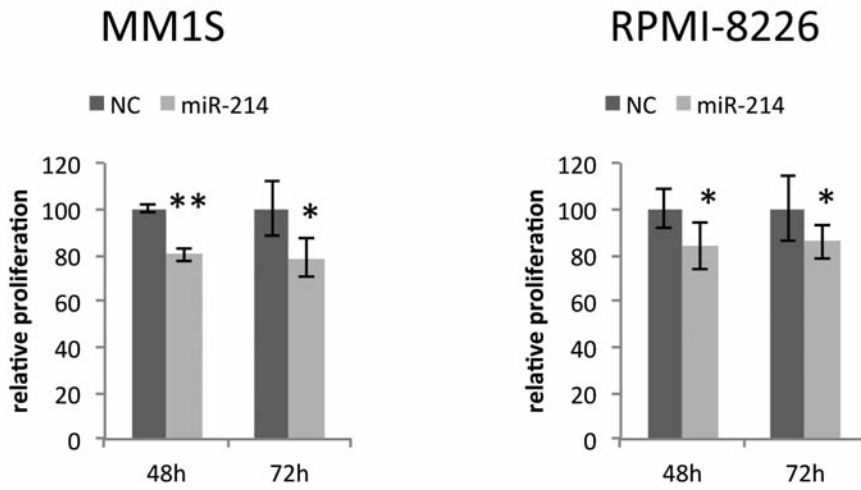**B**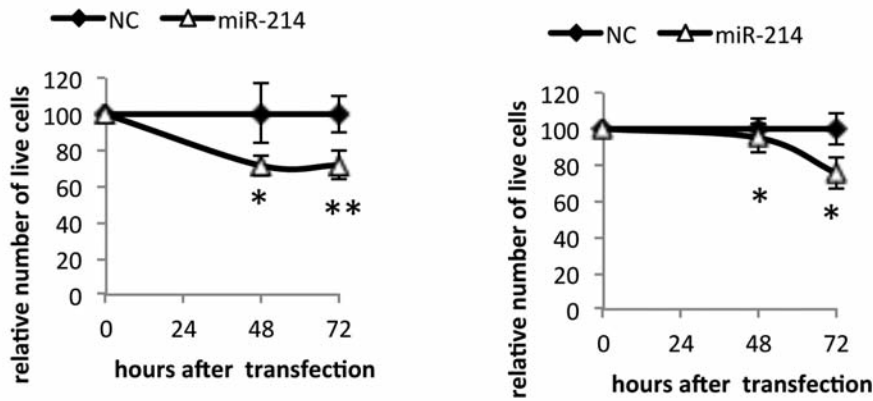

Online Supplementary Figure S2. MM1S left panel, RPMI-8226 right panel. (A) Proliferation evaluated by ATP quantitation (CellTiter-Glo®) of myeloma cells transfected with miR-214. The results are presented as the mean  $\pm$  SD of three different experiments and considering the result after non-targeting control (NC) transfection as 100%. (B) Relative number of live cells in a time course evaluated by trypan blue counting after miR-214 or non-targeting control (NC) transfection. \* $P$ <0.05; \*\* $P$ <0.01.

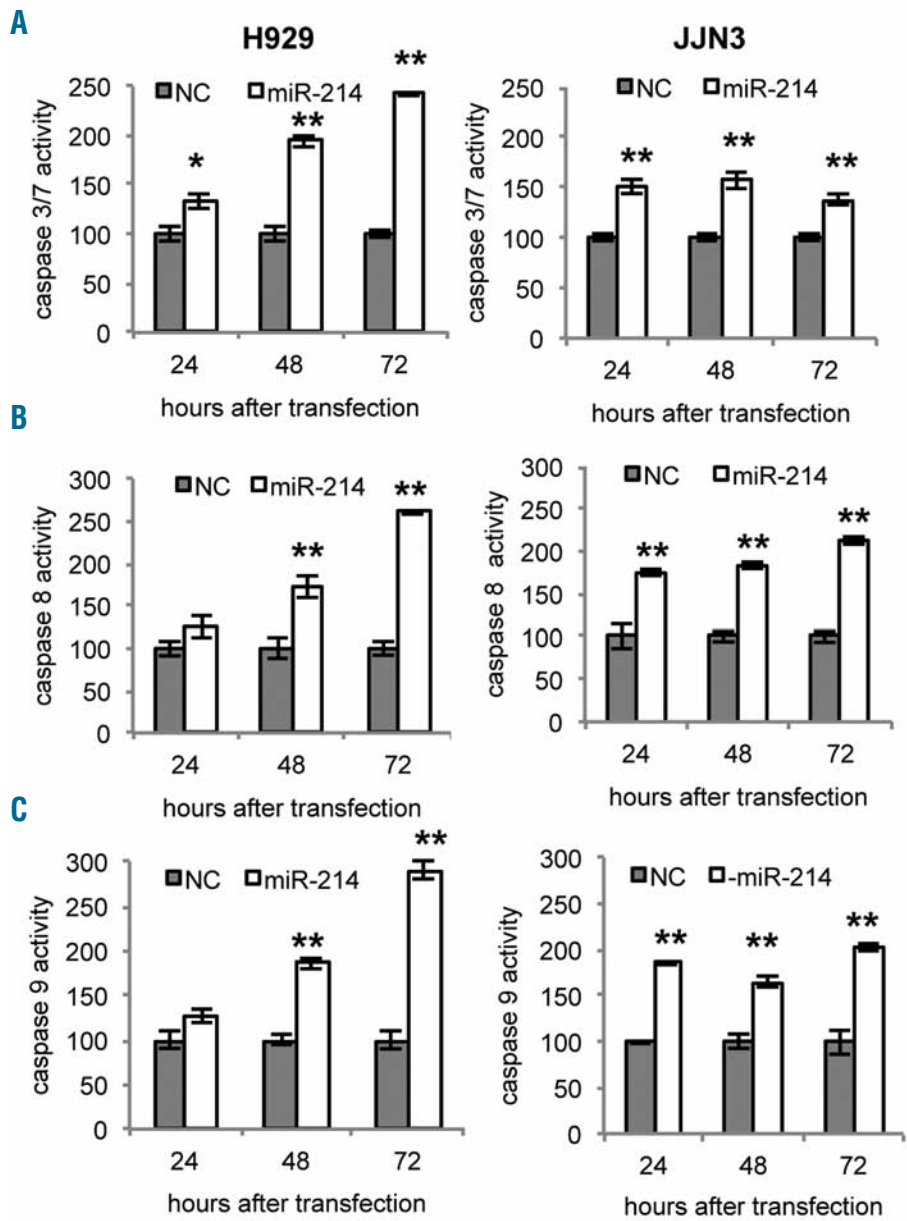

Online Supplementary Figure S3. Effect of miR-214 over-expression on caspase activity. H929 cell line (left panel) and JJN3 cell line (right panel). (A) Luminescent assays in a time course of caspases 3/7, (B) caspase 8 and (C) caspase 9. The results are presented as the mean  $\pm$  SD of three different experiments and considering the result after non-targeting control (NC) transfection as 100%. \* $P < 0.05$ ; \*\* $P < 0.01$ .

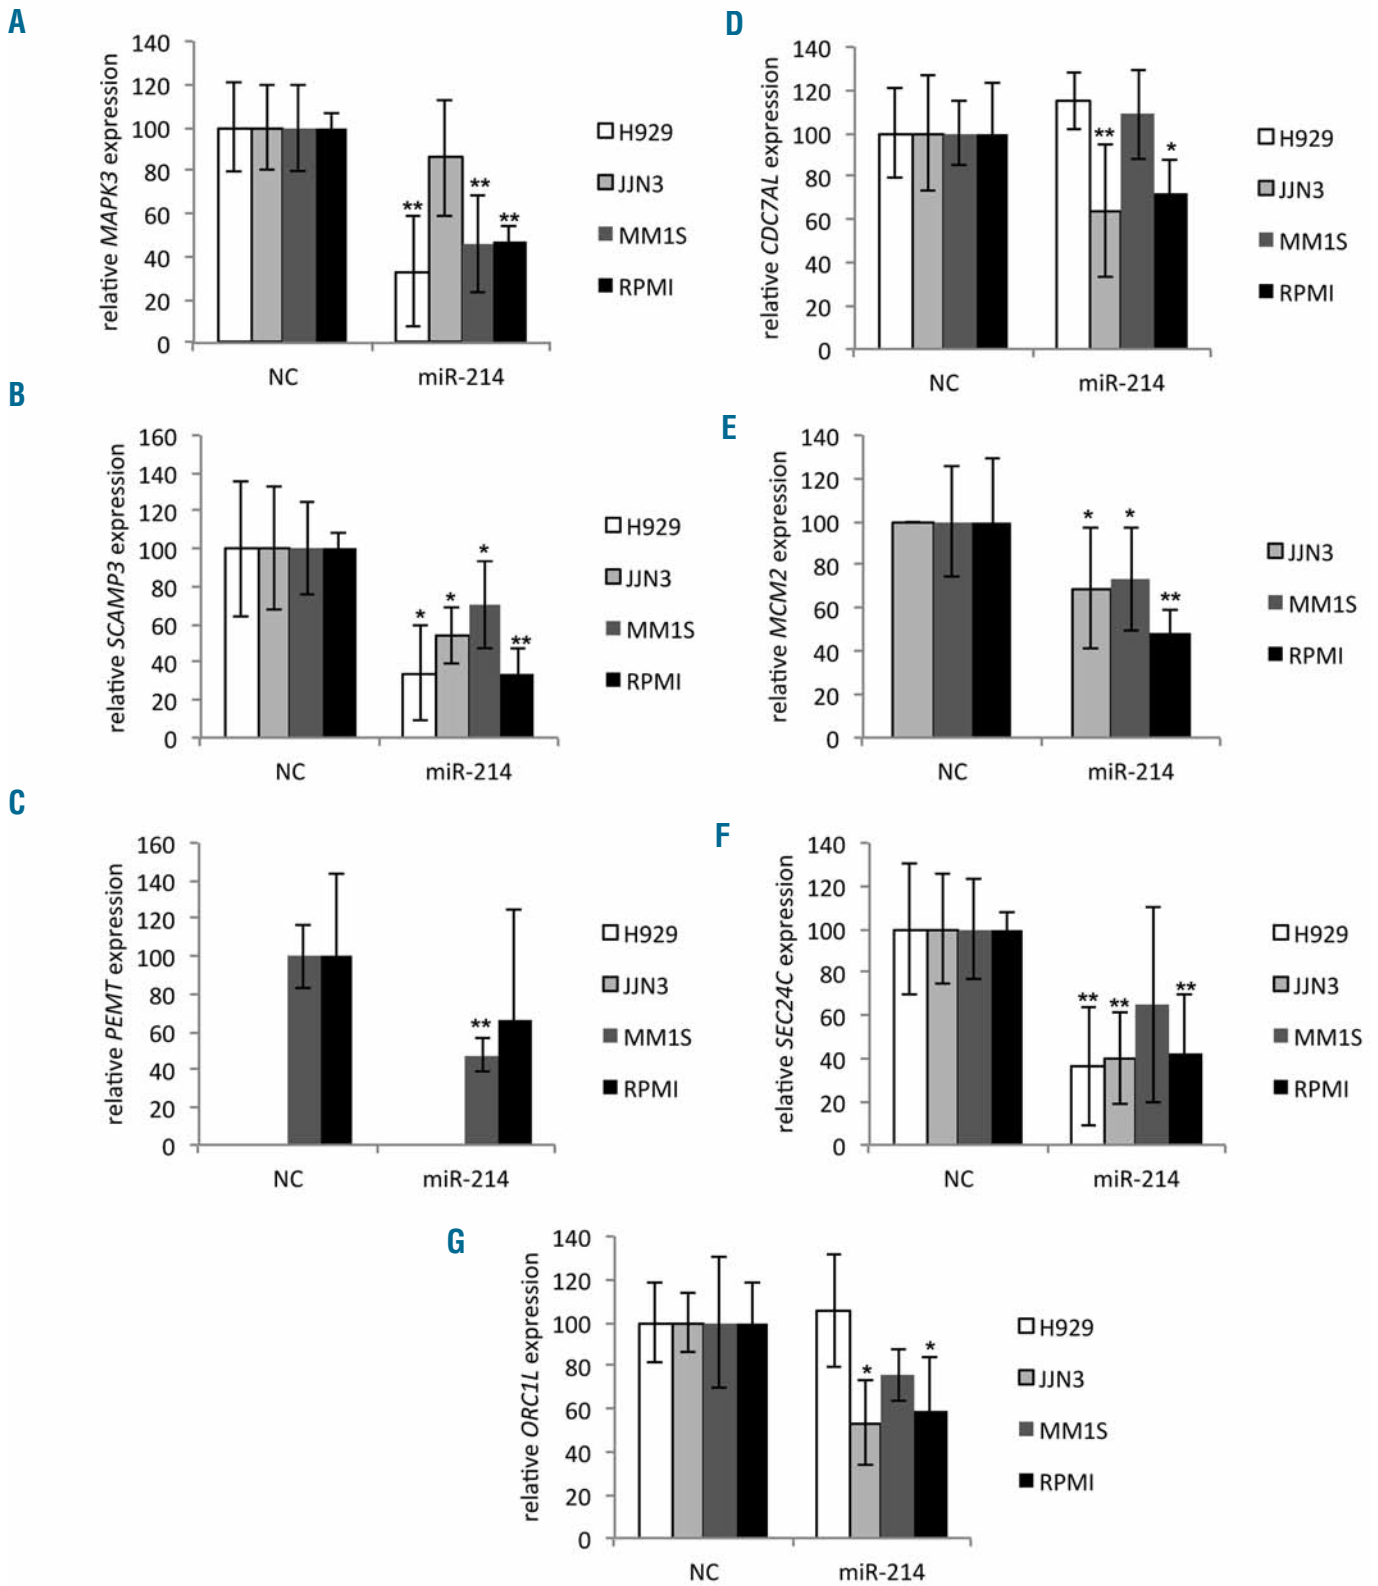

Online Supplementary Figure S4. mRNA level of (A) MAPK3, (B) SCAMP, (C) PEMT, (D) CDC7AL, (E) MCM2 (F) SEC24C, and (G) ORC1L, assessed by qRT-PCR after transfecting H929, JJN3, MM1S and RPMI-8226 cells with miR-214 precursor or NC. The results are shown as an average of three experiments after normalization with GAPDH. \* $P < 0.05$ , \*\* $P < 0.01$ . The H-929 cell line is not included in Figure 4E, because it is shown in Online Supplementary Figure S7. In H929 and JJN3 the level of expression of PEMT was below the detection limit.

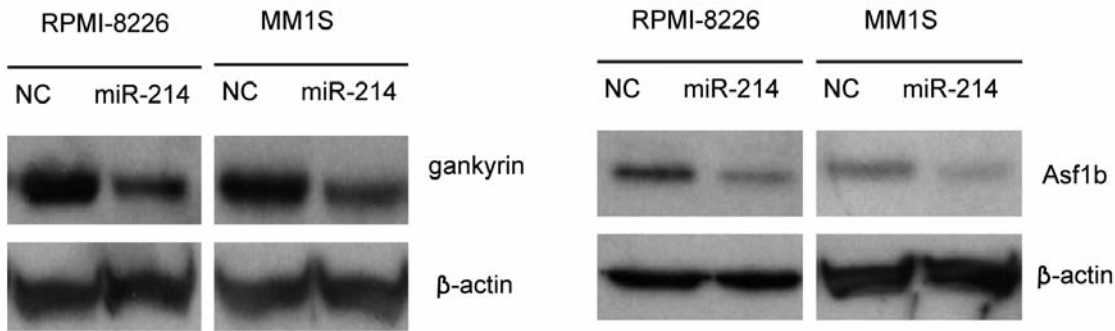

Online Supplementary Figure S5. Levels of gankyrin and Asf1b proteins in RPMI-8226 and MM1S cells at 48 h after transfection with miR-214 or NC, determined by western blotting.

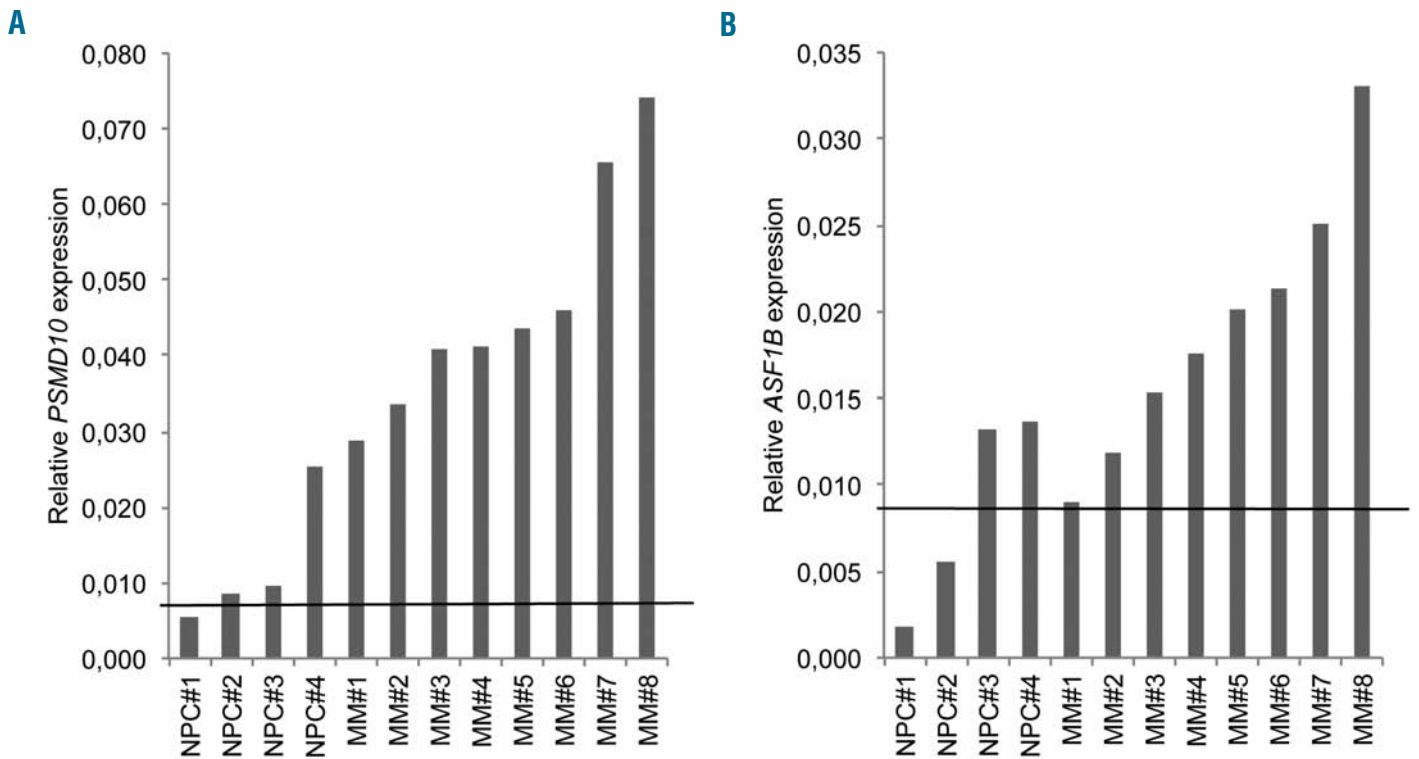

Online Supplementary Figure S6. Expression of *PSMD10* and *ASFB1* determined by qRT-PCR, in normal plasma cells and MM cells from patients. Relative values were calculated by the  $2^{-\Delta\Delta Ct}$  method. The dark line indicates the median of *PSMD10* and *ASFB1* expression in the four samples of normal plasma cells.

**A**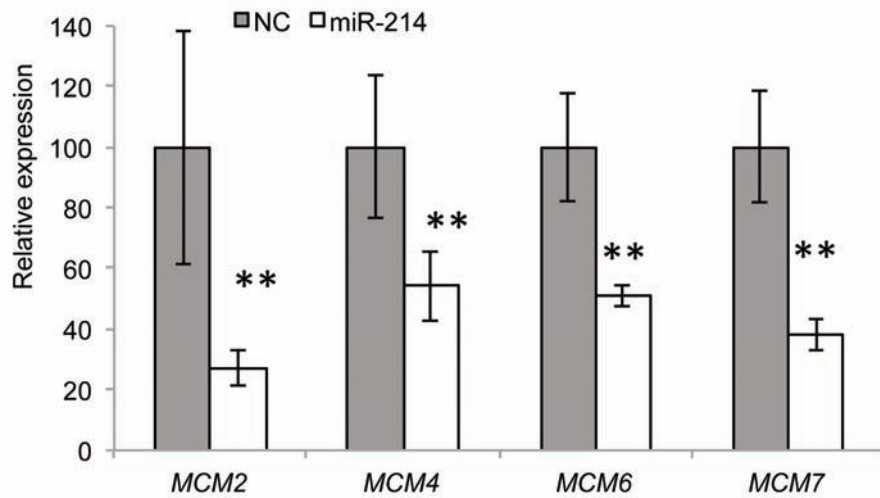**B**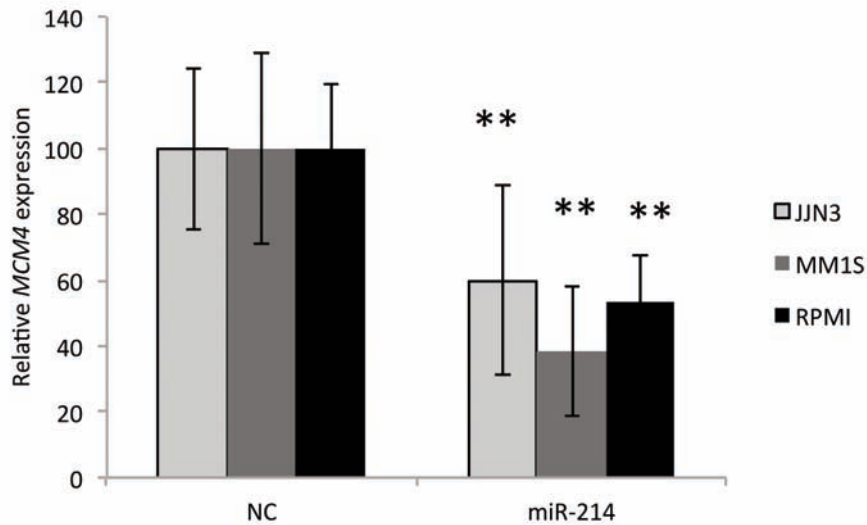

**Online Supplementary Figure S7.** Effect of miR-214 transfection on the MCM complex. (A) *MCM2*, 4, 6 and 7 mRNA expression in H929 cells, determined by qRT-PCR after H929 transfection with miR-214 precursor or NC. (B) *MCM4* expression in JLN3, MM1S and RPMI-8226 cells, determined by qRT-PCR after transfection with miR-214 precursor or NC.

Online Supplementary Table S1. Sequences of oligonucleotides for the wild-type-3'UTR and the mutated-3'UTR cloned into pmirGLO reporter vector.

| 3'UTR target     | Sense sequence (5' → 3')                       | Antisense sequence (5' → 3')                          |
|------------------|------------------------------------------------|-------------------------------------------------------|
| WT-PSMD10 3'UTR  | AACTAAACATGTTGACTCTTGTCCTGCTGAGTACTTGTCGT      | CTAGACGAACAAGTAAGTCTAGCAGGAAACAAGAGTCAACATGTGGTTAGTTT |
| MUT-PSMD10 3'UTR | AACTAAACATGTTGACTCTTGTTCCATCACGTTACTTGTCGT     | CTAGACGAACAAGTAACTGATGGGAACAAGAGTCAACATGTGGTTAGTTT    |
| WT-ASF1B 3'UTR   | AAACGTGCCTGTCAAGGCTCCAGTCCCTGCTGAGCCAAAGGCTTTT | CTAGAAAAGCCTTTGGCTCAGCAGGACTGGAGCCTTGACAGGCACGTTT     |
| MUT-ASF1B 3'UTR  | AAACGTGCCTGTCAAGGCTCCAGTCCCATCACGCCAAAGGCTTTT  | CTAGAAAAGCCTTTGGCGTGATGGGACTGGAGCCTTGACAGGCACGTTT     |

Online Supplementary Table S2. Genes differentially expressed by >2-fold after ectopic transfection of the H-929 cell line with miR-214, compared to non-targeting control using dChip software.

| probe set | non-targeting | miRNA-214 | me fold change | lower bound of | upper bound of | Transcript ID            | Transcript Description                                  | Gene Title                 | Gene Symbol                   |             |
|-----------|---------------|-----------|----------------|----------------|----------------|--------------------------|---------------------------------------------------------|----------------------------|-------------------------------|-------------|
| 1         | 8034772       | 1361,84   | 412,68         | -3,3           | -2,94          | -3,75 ENST00000263382    | /// Histone chaperone ASF1B                             | ASF1B anti-silencing func  | ASF1B                         |             |
| 2         | 8128001       | 488,69    | 162,21         | -3,01          | -2,54          | -3,69 ENST00000369582    | /// Glycoprotein hormones                               | alpglycoprotein hormones   | CGA                           |             |
| 3         | 7920707       | 874,33    | 325,56         | -2,69          | -2,33          | -3,16 GENSCAN000001153   | cdna:Genscan chromosome family with sequence si FAM189B |                            |                               |             |
| 4         | 8126095       | 583,43    | 218,01         | -2,68          | -2,38          | -3 ENST00000373405       | /// Novel protein gene:ENSG01 chromosome 6 open r       | C6orf129                   |                               |             |
| 5         | 7989647       | 1129,3    | 421,28         | -2,68          | -2,45          | -2,95 ENST00000380258    | /// hypothetical protein LOC97                          | KIAA0101                   | /// casein kin KIAA0101       | /// CSNK1G1 |
| 6         | 7948606       | 1827,15   | 688,93         | -2,65          | -2,44          | -2,89 ENST00000257262    | /// UPF0197 transmembrane                               | protein                    | chromosome 11 open r C11orf10 |             |
| 7         | 8000811       | 1446,29   | 549,06         | -2,63          | -2,35          | -2,98 ENST00000263025    | /// Mitogen-activated protein                           | mitogen-activated prot     | MAPK3                         |             |
| 8         | 7941104       | 1728,6    | 682,56         | -2,53          | -2,41          | -2,67 ENST00000246747    | /// ADP-ribosylation factor-like                        | ADP-ribosylation factor    | ARL2                          | /// SNX15   |
| 9         | 7920725       | 1792,13   | 733,69         | -2,44          | -2,27          | -2,64 ENST00000302631    | /// Isoform 1 of Secretory carr                         | secretory carrier memb     | SCAMP3                        |             |
| 10        | 8007620       | 1530,12   | 631,6          | -2,42          | -2,26          | -2,61 ENST00000053867    | /// Isoform 1 of Granulins gen                          | granulin                   | GRN                           |             |
| 11        | 8117408       | 1510,26   | 637,76         | -2,37          | -1,96          | -2,93 ENST00000303910    | cdna:known chromosome: histone cluster 1, H2ae          | HIST1H2AE                  |                               |             |
| 12        | 8039491       | 1175,22   | 495,35         | -2,37          | -2,14          | -2,64 ENST00000264552    | /// Ubiquitin-conjugating enzy                          | ubiquitin-conjugating e    | UBE2S                         |             |
| 14        | 8013120       | 2642,7    | 1151,11        | -2,3           | -2,15          | -2,46 ENST00000395783    | /// Isoform 1 of Phosphatidyle                          | phosphatidylethanolam      | PEMT                          |             |
| 15        | 8024900       | 799,48    | 351,22         | -2,28          | -1,81          | -3,05 ENST00000262952    | /// E3 ubiquitin-protein ligase                         | ubiquitin-like with PHD    | UHRF1                         |             |
| 16        | 8086880       | 517,08    | 228,17         | -2,27          | -2,06          | -2,5 ENST00000302506     | /// Isoform 1 of M-phase induc                          | cell division cycle 25 ho  | CDC25A                        |             |
| 17        | 8124440       | 1829,48   | 813,22         | -2,25          | -2,15          | -2,36 ENST00000321285    | cdna:known chromosome: histone cluster 1, H3g           | HIST1H3G                   |                               |             |
| 18        | 7964033       | 1087,65   | 486,35         | -2,24          | -1,98          | -2,55 ENST00000267116    | /// ankyrin repeat domain 52                            | ankyrin repeat domain      | ANKRD52                       |             |
| 19        | 8003204       | 1161,19   | 517,3          | -2,24          | -1,99          | -2,57 ENST00000253462    | /// DNA replication complex G                           | GINS complex subunit       | GIN2                          |             |
| 20        | 8138489       | 620,62    | 278,41         | -2,23          | -1,78          | -2,97 ENST00000373934    | /// cell division cycle associate                       | cell division cycle assoc  | CDC47                         |             |
| 21        | 8071212       | 729,77    | 331,08         | -2,2           | -1,99          | -2,47 ENST00000407835    | /// CDC45-related protein gen                           | CDC45 cell division cycl   | CDC45L                        | /// CDC45   |
| 22        | 7910997       | 558,79    | 254,8          | -2,19          | -2,01          | -2,4 GENSCAN000001491    | cdna:Genscan chromosome: exonuclease 1                  | EXO1                       |                               |             |
| 23        | 7922412       | 205       | 93,43          | -2,19          | -1,86          | -2,64 NR_003943          |                                                         | Homo sapiens small nucleoc | small nucleolar RNA, C/       | SNORD77     |
| 24        | 8082350       | 809,86    | 374,93         | -2,16          | -1,99          | -2,35 ENST00000265056    | /// DNA replication licensing f                         | minichromosome main        | MCM2                          |             |
| 25        | 7916167       | 528,94    | 247,69         | -2,14          | -1,77          | -2,69 ENST00000371568    | /// Origin recognition complex                          | origin recognition comp    | ORC1L                         |             |
| 26        | 8010260       | 427,15    | 201,55         | -2,12          | -1,87          | -2,44 ENST00000374948    | /// Isoform 3 of Baculoviral I                          | baculoviral IAP repeat-c   | BIRC5                         |             |
| 27        | 8117225       | 400,68    | 188,95         | -2,12          | -1,84          | -2,47 ENST00000378059    | /// Geminin gene:ENSG000000                             | geminin, DNA replicatio    | GMNN                          |             |
| 28        | 7928369       | 1040,17   | 489,62         | -2,12          | -2,04          | -2,21 ENST00000339365    | /// Protein transport protein                           | S SEC24 family, member     | SEC24C                        |             |
| 29        | 8146357       | 1383,88   | 654,61         | -2,11          | -2,01          | -2,22 ENST00000262105    | /// DNA replication licensing f                         | minichromosome main        | MCM4                          |             |
| 30        | 7937508       | 1044,51   | 496,88         | -2,1           | -1,98          | -2,24 ENST00000322008    | /// CD151 antigen gene:ENSG                             | CD151 molecule (Raph       | CD151                         |             |
| 31        | 8174379       | 3273,98   | 1559,05        | -2,1           | -1,96          | -2,25 GENSCAN00000062261 | cdna:Genscan chromosome: proteasome (prosome,           | PSMD10                     |                               |             |
| 32        | 8124437       | 2165,2    | 1041,7         | -2,08          | -1,97          | -2,17 ENST00000230495    | cdna:known chromosome: histone cluster 1, H3f           | HIST1H3F                   |                               |             |
| 33        | 8015712       | 394,28    | 191,52         | -2,06          | -1,87          | -2,28 ENST00000328434    | /// Coiled-coil domain-contain                          | coiled-coil domain cont    | CCDC56                        |             |
| 34        | 8151824       | 414,34    | 202,53         | -2,05          | -1,67          | -2,62 ENST00000336148    | /// DNA repair and recombina                            | RAD54 homolog B (S. ce     | RAD54B                        |             |
| 35        | 7952132       | 1430,55   | 698,81         | -2,05          | -1,93          | -2,17 ENST00000357590    | /// Isoform 1 of Glucose-6-ph                           | c solute carrier family 37 | SLC37A4                       |             |
| 36        | 7940147       | 845,12    | 413,4          | -2,04          | -1,63          | -2,69 ENST00000411426    | /// Isoform 2 of Protein FAM1                           | :family with sequence si   | FAM111B                       |             |
| 37        | 7985829       | 948,24    | 465,09         | -2,04          | -1,85          | -2,26 ENST00000310775    | /// Isoform 3 of Fanconi anem                           | Fanconi anemia, compl      | FANCI                         | /// POLG    |
| 38        | 8118111       | 376,06    | 184,47         | -2,04          | -1,82          | -2,3 LO6175              | /// NM_00667: Homo Sapiens                              | P5-1 mRNA, HLA complex     | P5                            | HCP5        |
| 39        | 8144153       | 510,85    | 250,81         | -2,04          | -1,81          | -2,32 GENSCAN000005486   | cdna:Genscan chromosome: non-SMC                        | condensin II c             | NCAPG2                        |             |
| 40        | 7960117       | 825,91    | 407,77         | -2,03          | -1,78          | -2,34 ENST00000317479    | /// Peroxisomal membrane                                | peroxisomal membrane       | PXMP2                         |             |
| 41        | 7964145       | 455,69    | 224,29         | -2,03          | -1,9           | -2,18 ENST00000447258    | cdna: FLJ58786, highly simi                             | timeless homolog (Dros     | TIMELESS                      |             |
| 42        | 8004521       | 1497,69   | 742,49         | -2,02          | -1,79          | -2,3 ENST00000250124     | /// Mannose-P-dolichol utiliz                           | mannose-P-dolichol uti     | MPDU1                         |             |
| 43        | 8048468       | 871,09    | 433,62         | -2,01          | -1,85          | -2,18 GENSCAN0000003698  | cdna:Genscan chromosome: family with sequence si        | FAM134A                    |                               |             |
| 44        | 7978846       | 515,22    | 255,87         | -2,01          | -1,77          | -2,32 ENST00000216367    | /// DNA polymerase epsilon                              | polym. polymerase (DNA     | direct)                       | POLE2       |
| 45        | 7982792       | 386,93    | 192,98         | -2,01          | -1,8           | -2,22 ENST00000382643    | /// RAD51 homolog (RecA hon                             | RAD51 homolog (RecA        | RAD51                         |             |
| 47        | 8089407       | 236,67    | 484,93         | 2,05           | 1,82           | 2,32 ENST00000232603     | /// MORC family CW-type zinc                            | MORC family CW-type        | : MORC1                       |             |
| 48        | 8103630       | 593,43    | 1228,49        | 2,07           | 1,9            | 2,25 ENST00000284637     | /// Isoform 1 of Putative E3                            | ub SH3 domain containi     | SH3RF1                        |             |
| 51        | 8167006       | 205,03    | 428,16         | 2,09           | 1,74           | 2,5 ENST00000218340      | /// Protein XRP2 gene:ENSG                              | 00 retinitis pigmentosa 2  | :RP2                          |             |
| 52        | 7944803       | 194,75    | 412,87         | 2,12           | 1,88           | 2,4 ENST00000456829      | /// Isoform 1 of Loss of hetero                         | von Willebrand factor      | VWFA5A                        |             |
| 53        | 7988767       | 94,84     | 203,17         | 2,14           | 1,83           | 2,48 ENST00000396402     | /// Cytochrome P450 19A1 ge                             | cytochrome P450, fami      | CYP19A1                       |             |
| 54        | 7900009       | 276,06    | 590,95         | 2,14           | 1,95           | 2,35 ENST00000373210     | cdna:known chromosome: eukaryotic                       | translation i              | EIF2C4                        |             |
| 55        | 8124280       | 306,33    | 657,82         | 2,15           | 1,97           | 2,33 ENST00000259698     | /// Isoform 1 of Protein FAM6                           | :family with sequence si   | FAM65B                        |             |
| 56        | 8078272       | 416,78    | 894,9          | 2,15           | 2              | 2,31 ENST00000396676     | /// NR1D2 protein gene:ENSG                             | nuclear receptor subfar    | NR1D2                         |             |
| 58        | 7906140       | 607,79    | 1380,52        | 2,27           | 2,07           | 2,49 GENSCAN0000004197   | cdna:Genscan chromosome: polyamine-                     | modulated f                | PMF1                          | /// BGLAP   |
| 59        | 8113369       | 249,99    | 572,99         | 2,29           | 2,06           | 2,55 ENST00000310954     | /// Solute carrier organic anio                         | solute carrier organic a   | SLCO4C1                       |             |
| 60        | 7906339       | 132,41    | 307,36         | 2,32           | 2,05           | 2,64 ENST00000289429     | /// T-cell surface glycoprotein                         | CD1a molecule              | CD1A                          |             |
| 61        | 8064485       | 142,29    | 355,74         | 2,5            | 2,25           | 2,78 ENST00000381583     | /// Isoform 4 of Signal-regulat                         | signal-regulatory protei   | SIRP3                         |             |
| 62        | 8014369       | 256,11    | 687,91         | 2,69           | 2,38           | 3,06 ENST00000225245     | /// C-C motif chemokine 3 gen                           | chemokine (C-C motif)      | CC3                           |             |
| 63        | 8110032       | 371,94    | 1005,35        | 2,7            | 2,48           | 2,94 ENST00000296953     | /// Isoform 1 of UPF0474 prot                           | chromosome 5 open r        | C5orf41                       |             |
| 64        | 8090193       | 948,38    | 2651,12        | 2,8            | 2,59           | 3,01 ENST00000311127     | /// Isoform 1 of Protein HEG                            | h-HEG homolog 1 (zebraf    | HEG1                          |             |
| 65        | 8082075       | 124,26    | 400,64         | 3,22           | 2,79           | 3,78 ENST00000296161     | /// Protein dextex-3-like gene                          | :dextex 3-like (Drosophil  | DTX3L                         | /// PARP9   |
| 66        | 8085716       | 77,94     | 250,9          | 3,22           | 2,71           | 3,77 GENSCAN0000005383   | cdna:Genscan chromosome: SATB                           | homeobox 1                 | SATB1                         |             |
| 67        | 8133688       | 250,07    | 882,09         | 3,53           | 1,8            | 5,83 NR_002955           |                                                         | Homo sapiens small nucleoc | small nucleolar RNA, H/       | SNORA14A    |
| 68        | 7984364       | 202,03    | 745,98         | 3,69           | 3,23           | 4,25 ENST00000327367     | /// Mothers against decapent                            | SMAD family member         | SMAD3                         |             |
| 69        | 8170990       | 485,93    | 1805,87        | 3,72           | 2,27           | 8,17 NR_002969           |                                                         | Homo sapiens small nucleoc | small nucleolar RNA, H/       | SNORA36A    |

**Online Supplementary Table S3.** Genes that were down-regulated in H929 cells transfected with miR-214 compared to cells transfected with non-targeting control (NC), and which were predicted as potential direct targets for miR 214.

| Gene symbol   | Transcript ID                                     | Chromosome location | Description                                              | Protein function*                                                                                                                  | Fold change** |
|---------------|---------------------------------------------------|---------------------|----------------------------------------------------------|------------------------------------------------------------------------------------------------------------------------------------|---------------|
| <i>ASF1B</i>  | NM_018154                                         | 19p13.12            | Anti-silencing function 1 homolog B                      | Histone H3/H4 chaperone<br>Promotes replication-dependent chromatin assembly                                                       | -3.3          |
| <i>MAPK3</i>  | NM_002746 ///<br>NM_001040056 ///<br>NM_001109891 | 16p11.2             | Mitogen-activated protein kinase 3                       | Initiation and regulation of meiosis, mitosis, and postmitotic functions in differentiated cells                                   | -2.63         |
| <i>SCAMP3</i> | NM_005698 ///<br>NM_052837                        | 1q21                | Secretory carrier-associated membrane protein 3          | Functions in post-Golgi recycling pathways. Acts as a recycling carrier to the cell surface                                        | -2.44         |
| <i>PEMT</i>   | NM_148172 ///<br>NM_148173 ///<br>NM_007169       | 17p11.2             | Phosphatidylethanolamine N-methyltransferase             | Catalyzes three sequential methylation of phosphatidylethanolamine                                                                 | -2.3          |
| <i>CDCA7L</i> | NM_018719 ///<br>NM_001127370///<br>NM_001127371  | 7p15.3              | Cell division cycle-associated 7-like protein            | Transcriptional regulation as a repressor that inhibits monoamine oxidase A activity                                               | -2.23         |
| <i>MCM2</i>   | NM_004526                                         | 3q21                | Minichromosome maintenance complex component 2           | Component of the MCM2-7 complex which is the putative replicative helicase essential for DNA replication initiation and elongation | -2.16         |
| <i>ORC1L</i>  | NM_004153                                         | 1p32                | Origin recognition complex, subunit 1                    | Component of the origin recognition complex (ORC) that binds origins of replication                                                | -2.14         |
| <i>SEC24C</i> | NM_004922 ///<br>NM_198597                        | 10q22.2             | Protein transport protein Sec24C                         | Transport from the endoplasmic reticulum to the Golgi apparatus                                                                    | -2.12         |
| <i>PSMD10</i> | NM_170750 ///<br>NM_002814                        | Xq22.3              | 26S proteasome non-ATPase regulatory subunit 10/gankyrin | Proteasome subunit. Acts as an proto-oncoprotein by being involved in negative regulation of tumor suppressors RB1 and p53/TP53    | -2.1          |

\*According to UniProtKB/Swiss-Prot database. \*\*Fold change expressed using the H929 cells transfected with NC as the baseline.
