# Supplementary material
Source: PubMed Central journal article supplement (PMC3659997)
Supplement: supp_2012.070011_2012_070011-Contributions.pdf [file supp_2012.070011_2012_070011-Contributions.pdf]

**Manuscript no. HAEMATOL/2012/070011 entitled “Restoration of miR-214 expression reduces growth of myeloma cells through a positive regulation of P53 and inhibition of DNA replication“**

**Authors: Irena Misiewicz-Krzeminska, María Eugenia Sarasquete, Dalia Quwaider, Patryk Krzeminski, Fany Veronica Ticona, Teresa Paíno, Manuel Delgado, Andreia Aires, Enrique M. Ocio, Ramón García-Sanz, Jesús F. San Miguel and Norma C. Gutiérrez**

**Information about the contributions of each person named as having participated in the study**

**1) Guarantor(s), i.e., person(s) who is (are) responsible for the integrity of the work as a whole:**

- Norma C. Gutiérrez , Department of Hematology, University Hospital of Salamanca, Paseo San Vicente, 58-182, Salamanca, 37007, SPAIN, [normagu@usal.es](mailto:normagu@usal.es)
- Irena Misiewicz-Krzeminska, Department of Hematology, University Hospital of Salamanca, Paseo San Vicente, 58-182, Salamanca, 37007, SPAIN, [irenamk@usal.es](mailto:irenamk@usal.es)

According to the International Committee of Medical Journal Editors (ICMJE) ([http://www.icmje.org/ethical\\_1author.html](http://www.icmje.org/ethical_1author.html)): “Authorship credit should be based on: 1) substantial contributions to conception and design, acquisition of data, or analysis and interpretation of data; 2) drafting the article or revising it critically for important intellectual content; and 3) final approval of the version to be published. Authors should meet conditions 1, 2, and 3 ..... Acquisition of funding, collection of data, or general supervision of the research group alone does not constitute authorship”.

**The guarantors of this manuscript confirm that all persons designated as authors qualify for authorship, and that each author has participated sufficiently in the work to take public responsibility for appropriate portions of the content.**

**2) Authors who participated in the conception of the study:**

- Irena Misiewicz-Krzeminska
- Norma C. Gutierrez
- Jesús F. San Miguel

**3) Design & Methods.**

- Irena Misiewicz-Krzeminska, Norma C. Gutierrez and Jesús F. San Miguel were responsible for designing the study
- The methods used for the results specified in the section 4 have been developed for the same authors indicated in this section

**4) Results. The following authors were responsible for specific portions of the results, including figures and tables:**

- Irena Misiewicz-Krzeminska was the responsible for all the experiments and figures, in some of them in collaboration with:
- María E. Sarasquete was responsible for miRNA quantification and part of qPCR studies
- Dalia Quwaider was responsible for 3’UTR luciferase study (figure 4)
- Patryk Krzeminski was responsible for methylation study and isolation of RNA from MM samples (figure 1, Supplementary figure 6).
- Fany V. Ticona was responsible for miRNA quantification
- Teresa Paíno was responsible for cell lines immunophenotype study
- Manuel Delgado was responsible for bioinformatic analysis
- Andreia Aires participated in cells transfections
- Enrique M. Ocio and Ramón García-Sanz provided patients’ samples

**5) Writing the manuscript. The following authors were responsible for writing the manuscript:**

- Irena Misiewicz-Krzeminska and Norma C. Gutierrez were responsible for writing a first revised draft of the manuscript. Jesus San Miguel reviewed the manuscript before it was distributed to other authors.
- All authors contributed to the final written version of the manuscript

**6) Contributors Listed in Acknowledgments:**

The authors would like to thank to:

- Encarna Fermiñán for technical assistance with microarray study
- Xabier Agirre for technical assistance with cells transfection
- This work was partially supported by Spanish FIS (PI080568 and PS0901897), the "Gerencia Regional de Salud, Junta de Castilla y León" (GRS202/A08 and GRS 702/A/11), and the Spanish Myeloma Network Program (RD06/0020/0006). M.E.S is supported by the Ministerio de Sanidad y Consumo (CA08/00212)
